# Supplementary material
Source: PubMed Central journal article supplement (PMC4667391)
Supplement: aasm.38.12.1887s1.pdf [file aasm.38.12.1887s1.pdf]

**Table S1. Predicted AHI<sub>3a</sub> with associated 90% and 95% prediction interval using an AHI<sub>4</sub> referent**

| Referent AHI <sub>4</sub> | Predicted AHI <sub>3a</sub> | Lower 95% prediction interval | Lower 90% prediction interval | Upper 90% prediction interval | Upper 95% prediction interval |
|---------------------------|-----------------------------|-------------------------------|-------------------------------|-------------------------------|-------------------------------|
| 0.0                       | 2.5                         | 0.0                           | 0.1                           | 5.8                           | 7.7                           |
| 1.0                       | 5.1                         | 1.6                           | 1.9                           | 10.1                          | 12.2                          |
| 2.0                       | 7.6                         | 3.4                           | 3.8                           | 13.2                          | 15.1                          |
| 3.0                       | 9.7                         | 5.3                           | 5.7                           | 15.7                          | 18.1                          |
| 4.0                       | 11.4                        | 6.3                           | 6.8                           | 17.7                          | 20.9                          |
| 5.0                       | 13.0                        | 7.3                           | 7.9                           | 20.9                          | 23.2                          |
| 6.0                       | 14.4                        | 8.6                           | 9.3                           | 21.7                          | 24.9                          |
| 7.0                       | 15.8                        | 10.2                          | 10.5                          | 23.5                          | 26.8                          |
| 8.0                       | 17.1                        | 10.9                          | 11.6                          | 24.7                          | 27.7                          |
| 9.0                       | 18.5                        | 12.0                          | 12.5                          | 25.8                          | 29.5                          |
| 10.0                      | 19.8                        | 13.0                          | 13.5                          | 27.4                          | 31.2                          |
| 11.0                      | 21.1                        | 14.0                          | 14.8                          | 29.5                          | 32.8                          |
| 12.0                      | 22.3                        | 15.3                          | 15.8                          | 31.3                          | 34.9                          |
| 13.0                      | 23.4                        | 16.5                          | 16.7                          | 33.3                          | 36.9                          |
| 14.0                      | 24.5                        | 17.4                          | 18.1                          | 34.0                          | 37.8                          |
| 15.0                      | 25.7                        | 18.4                          | 19.4                          | 35.2                          | 38.9                          |
| 16.0                      | 27.0                        | 19.4                          | 20.2                          | 36.6                          | 39.8                          |
| 17.0                      | 28.2                        | 20.3                          | 21.0                          | 37.6                          | 40.4                          |
| 18.0                      | 29.5                        | 21.4                          | 22.1                          | 39.1                          | 41.6                          |
| 19.0                      | 30.9                        | 22.6                          | 23.6                          | 41.1                          | 43.5                          |
| 20.0                      | 32.2                        | 23.8                          | 25.0                          | 42.9                          | 45.3                          |
| 21.0                      | 33.3                        | 24.8                          | 26.1                          | 44.1                          | 46.5                          |
| 22.0                      | 34.5                        | 25.8                          | 27.0                          | 44.9                          | 47.6                          |
| 23.0                      | 35.5                        | 26.9                          | 27.8                          | 45.6                          | 48.8                          |
| 24.0                      | 36.4                        | 28.0                          | 28.7                          | 46.2                          | 50.1                          |
| 25.0                      | 37.4                        | 29.0                          | 29.5                          | 47.0                          | 51.4                          |
| 26.0                      | 38.3                        | 30.0                          | 30.4                          | 47.7                          | 52.6                          |
| 27.0                      | 39.3                        | 30.8                          | 31.2                          | 48.6                          | 53.5                          |
| 28.0                      | 40.3                        | 31.4                          | 32.0                          | 49.6                          | 54.3                          |
| 29.0                      | 41.3                        | 32.1                          | 32.8                          | 50.6                          | 55.1                          |
| 30.0                      | 42.3                        | 32.8                          | 33.6                          | 51.7                          | 55.8                          |
| 31.0                      | 43.3                        | 33.5                          | 34.5                          | 52.8                          | 56.7                          |
| 32.0                      | 44.3                        | 34.4                          | 35.4                          | 53.9                          | 57.6                          |
| 33.0                      | 45.3                        | 35.3                          | 36.4                          | 55.0                          | 58.6                          |
| 34.0                      | 46.3                        | 36.2                          | 37.4                          | 56.1                          | 59.7                          |
| 35.0                      | 47.2                        | 37.2                          | 38.4                          | 57.2                          | 60.9                          |
| 36.0                      | 48.2                        | 38.2                          | 39.4                          | 58.3                          | 62.1                          |
| 37.0                      | 49.1                        | 39.2                          | 40.4                          | 59.4                          | 63.3                          |
| 38.0                      | 50.0                        | 40.3                          | 41.4                          | 60.5                          | 64.4                          |
| 39.0                      | 51.0                        | 41.2                          | 42.3                          | 61.6                          | 65.6                          |
| 40.0                      | 51.8                        | 42.2                          | 43.3                          | 62.6                          | 66.7                          |
| 41.0                      | 52.7                        | 43.2                          | 44.2                          | 63.7                          | 67.8                          |
| 42.0                      | 53.6                        | 44.1                          | 45.2                          | 64.7                          | 68.9                          |
| 43.0                      | 54.5                        | 45.0                          | 46.1                          | 65.7                          | 69.9                          |
| 44.0                      | 55.3                        | 45.9                          | 47.0                          | 66.7                          | 71.0                          |
| 45.0                      | 56.1                        | 46.8                          | 47.9                          | 67.6                          | 72.0                          |
| 46.0                      | 57.0                        | 47.7                          | 48.7                          | 68.6                          | 73.0                          |
| 47.0                      | 57.8                        | 48.5                          | 49.6                          | 69.6                          | 73.9                          |
| 48.0                      | 58.6                        | 49.4                          | 50.5                          | 70.5                          | 74.9                          |
| 49.0                      | 59.5                        | 50.3                          | 51.4                          | 71.5                          | 75.9                          |

Table S1 Continued . . .

| Referent<br>AHI <sub>4</sub> | Predicted<br>AHI <sub>3a</sub> | Lower 95%<br>prediction interval | Lower 90%<br>prediction interval | Upper 90%<br>prediction interval | Upper 95%<br>prediction interval |
|------------------------------|--------------------------------|----------------------------------|----------------------------------|----------------------------------|----------------------------------|
| 50.0                         | 60.3                           | 51.1                             | 52.2                             | 72.4                             | 76.8                             |
| 51.0                         | 61.1                           | 52.0                             | 53.1                             | 73.3                             | 77.7                             |
| 52.0                         | 62.0                           | 52.8                             | 54.0                             | 74.3                             | 78.7                             |
| 53.0                         | 62.8                           | 53.7                             | 54.8                             | 75.2                             | 79.6                             |
| 54.0                         | 63.6                           | 54.6                             | 55.7                             | 76.1                             | 80.6                             |
| 55.0                         | 64.5                           | 55.4                             | 56.6                             | 77.0                             | 81.5                             |
| 56.0                         | 65.3                           | 56.3                             | 57.4                             | 77.9                             | 82.4                             |
| 57.0                         | 66.2                           | 57.2                             | 58.3                             | 78.9                             | 83.3                             |
| 58.0                         | 67.0                           | 58.0                             | 59.2                             | 79.8                             | 84.3                             |
| 59.0                         | 67.9                           | 58.9                             | 60.1                             | 80.7                             | 85.2                             |
| 60.0                         | 68.8                           | 59.8                             | 60.9                             | 81.6                             | 86.1                             |
| 61.0                         | 69.6                           | 60.7                             | 61.8                             | 82.5                             | 87.0                             |
| 62.0                         | 70.5                           | 61.6                             | 62.7                             | 83.4                             | 87.9                             |
| 63.0                         | 71.4                           | 62.4                             | 63.6                             | 84.3                             | 88.8                             |
| 64.0                         | 72.3                           | 63.3                             | 64.5                             | 85.2                             | 89.7                             |
| 65.0                         | 73.1                           | 64.2                             | 65.4                             | 86.1                             | 90.6                             |
| 66.0                         | 74.0                           | 65.1                             | 66.3                             | 87.1                             | 91.6                             |
| 67.0                         | 74.9                           | 66.0                             | 67.2                             | 88.0                             | 92.5                             |
| 68.0                         | 75.8                           | 66.9                             | 68.1                             | 88.9                             | 93.4                             |
| 69.0                         | 76.7                           | 67.8                             | 69.0                             | 89.8                             | 94.3                             |
| 70.0                         | 77.6                           | 68.7                             | 69.9                             | 90.7                             | 95.2                             |
| 71.0                         | 78.5                           | 69.6                             | 70.8                             | 91.6                             | 96.1                             |
| 72.0                         | 79.4                           | 70.5                             | 71.7                             | 92.5                             | 97.0                             |
| 73.0                         | 80.3                           | 71.4                             | 72.6                             | 93.4                             | 97.9                             |
| 74.0                         | 81.2                           | 72.3                             | 73.5                             | 94.3                             | 98.8                             |
| 75.0                         | 82.2                           | 73.2                             | 74.4                             | 95.2                             | 99.7                             |
| 76.0                         | 83.1                           | 74.2                             | 75.3                             | 96.1                             | 100.6                            |
| 77.0                         | 84.0                           | 75.1                             | 76.2                             | 97.0                             | 101.5                            |
| 78.0                         | 84.9                           | 76.0                             | 77.1                             | 97.9                             | 102.4                            |
| 79.0                         | 85.9                           | 76.9                             | 78.1                             | 98.8                             | 103.3                            |
| 80.0                         | 86.8                           | 77.8                             | 79.0                             | 99.7                             | 104.2                            |
| 81.0                         | 87.7                           | 78.8                             | 79.9                             | 100.6                            | 105.1                            |
| 82.0                         | 88.7                           | 79.7                             | 80.8                             | 101.5                            | 106.0                            |
| 83.0                         | 89.6                           | 80.6                             | 81.8                             | 102.4                            | 106.9                            |
| 84.0                         | 90.5                           | 81.5                             | 82.7                             | 103.3                            | 107.8                            |
| 85.0                         | 91.5                           | 82.5                             | 83.6                             | 104.2                            | 108.7                            |
| 86.0                         | 92.4                           | 83.4                             | 84.6                             | 105.1                            | 109.6                            |
| 87.0                         | 93.4                           | 84.3                             | 85.5                             | 106.0                            | 110.5                            |
| 88.0                         | 94.3                           | 85.3                             | 86.4                             | 106.9                            | 111.4                            |
| 89.0                         | 95.3                           | 86.2                             | 87.3                             | 107.8                            | 112.3                            |
| 90.0                         | 96.2                           | 87.2                             | 88.3                             | 108.7                            | 113.2                            |
| 91.0                         | 97.2                           | 88.1                             | 89.2                             | 109.6                            | 114.1                            |
| 92.0                         | 98.1                           | 89.0                             | 90.2                             | 110.5                            | 115.0                            |
| 93.0                         | 99.1                           | 90.0                             | 91.1                             | 111.5                            | 116.0                            |
| 94.0                         | 100.1                          | 91.0                             | 92.1                             | 112.4                            | 116.9                            |
| 95.0                         | 101.0                          | 91.9                             | 93.0                             | 113.4                            | 117.8                            |
| 96.0                         | 102.0                          | 92.9                             | 94.0                             | 114.3                            | 118.8                            |
| 97.0                         | 103.0                          | 93.8                             | 94.9                             | 115.0                            | 119.4                            |
| 98.0                         | 103.9                          | 94.7                             | 95.8                             | 116.0                            | 120.4                            |
| 99.0                         | 104.9                          | 95.7                             | 96.8                             | 117.0                            | 121.4                            |
| 100.0                        | 105.9                          | 96.7                             | 97.8                             | 117.9                            | 122.4                            |

**Table S2. Predicted AHI<sub>3</sub> with associated 90% and 95% prediction interval using an AHI<sub>4</sub> referent**

| Referent AHI <sub>4</sub> | Predicted AHI <sub>3</sub> | Lower 95% prediction interval | Lower 90% prediction interval | Upper 90% prediction interval | Upper 95% prediction interval |
|---------------------------|----------------------------|-------------------------------|-------------------------------|-------------------------------|-------------------------------|
| 0.0                       | 0.7                        | 0.0                           | 0.0                           | 1.4                           | 2.1                           |
| 1.0                       | 2.6                        | 1.1                           | 1.2                           | 4.6                           | 5.1                           |
| 2.0                       | 4.4                        | 2.2                           | 2.3                           | 7.1                           | 7.5                           |
| 3.0                       | 6.2                        | 3.6                           | 3.9                           | 8.7                           | 9.2                           |
| 4.0                       | 7.8                        | 4.7                           | 5.2                           | 11.2                          | 11.6                          |
| 5.0                       | 9.3                        | 5.9                           | 6.3                           | 13.1                          | 13.9                          |
| 6.0                       | 10.7                       | 7.1                           | 7.7                           | 14.7                          | 16.3                          |
| 7.0                       | 12.1                       | 8.4                           | 8.7                           | 16.1                          | 17.2                          |
| 8.0                       | 13.4                       | 9.6                           | 10.1                          | 17.3                          | 18.4                          |
| 9.0                       | 14.7                       | 10.6                          | 11.1                          | 19.3                          | 21.1                          |
| 10.0                      | 16.0                       | 11.5                          | 12.1                          | 21.1                          | 22.9                          |
| 11.0                      | 17.2                       | 12.5                          | 12.9                          | 22.5                          | 23.3                          |
| 12.0                      | 18.4                       | 13.7                          | 14.2                          | 24.2                          | 25.6                          |
| 13.0                      | 19.6                       | 14.9                          | 15.5                          | 25.8                          | 27.4                          |
| 14.0                      | 20.8                       | 15.8                          | 16.4                          | 27.3                          | 29.2                          |
| 15.0                      | 22.0                       | 16.8                          | 17.4                          | 28.8                          | 30.8                          |
| 16.0                      | 23.2                       | 17.9                          | 18.4                          | 30.0                          | 32.0                          |
| 17.0                      | 24.4                       | 18.9                          | 19.3                          | 31.1                          | 33.0                          |
| 18.0                      | 25.6                       | 20.0                          | 20.4                          | 32.4                          | 34.3                          |
| 19.0                      | 26.8                       | 21.0                          | 21.6                          | 34.0                          | 35.7                          |
| 20.0                      | 28.0                       | 22.0                          | 22.7                          | 35.5                          | 37.0                          |
| 21.0                      | 29.1                       | 23.0                          | 23.7                          | 36.7                          | 38.0                          |
| 22.0                      | 30.2                       | 24.0                          | 24.7                          | 37.7                          | 39.1                          |
| 23.0                      | 31.3                       | 25.2                          | 25.7                          | 38.7                          | 40.2                          |
| 24.0                      | 32.4                       | 26.4                          | 26.9                          | 39.9                          | 41.4                          |
| 25.0                      | 33.5                       | 27.6                          | 28.0                          | 41.1                          | 42.7                          |
| 26.0                      | 34.6                       | 28.7                          | 29.0                          | 42.2                          | 43.9                          |
| 27.0                      | 35.7                       | 29.6                          | 30.0                          | 43.2                          | 44.9                          |
| 28.0                      | 36.7                       | 30.4                          | 30.8                          | 44.2                          | 45.8                          |
| 29.0                      | 37.8                       | 31.3                          | 31.7                          | 45.2                          | 46.6                          |
| 30.0                      | 38.9                       | 32.0                          | 32.5                          | 46.2                          | 47.5                          |
| 31.0                      | 39.9                       | 32.9                          | 33.3                          | 47.2                          | 48.5                          |
| 32.0                      | 40.9                       | 33.7                          | 34.2                          | 48.2                          | 49.5                          |
| 33.0                      | 41.9                       | 34.7                          | 35.2                          | 49.3                          | 50.6                          |
| 34.0                      | 42.9                       | 35.6                          | 36.1                          | 50.3                          | 51.8                          |
| 35.0                      | 43.9                       | 36.6                          | 37.1                          | 51.4                          | 53.0                          |
| 36.0                      | 44.8                       | 37.6                          | 38.1                          | 52.5                          | 54.2                          |
| 37.0                      | 45.8                       | 38.6                          | 39.1                          | 53.6                          | 55.5                          |
| 38.0                      | 46.7                       | 39.6                          | 40.1                          | 54.7                          | 56.7                          |
| 39.0                      | 47.6                       | 40.5                          | 41.1                          | 55.7                          | 58.0                          |
| 40.0                      | 48.5                       | 41.5                          | 42.1                          | 56.8                          | 59.2                          |
| 41.0                      | 49.5                       | 42.5                          | 43.0                          | 57.9                          | 60.4                          |
| 42.0                      | 50.4                       | 43.4                          | 44.0                          | 58.9                          | 61.6                          |
| 43.0                      | 51.3                       | 44.4                          | 45.0                          | 59.9                          | 62.7                          |
| 44.0                      | 52.2                       | 45.3                          | 45.9                          | 61.0                          | 63.9                          |
| 45.0                      | 53.1                       | 46.3                          | 46.9                          | 62.0                          | 65.0                          |
| 46.0                      | 54.0                       | 47.2                          | 47.8                          | 63.0                          | 66.1                          |
| 47.0                      | 54.9                       | 48.1                          | 48.7                          | 64.0                          | 67.2                          |
| 48.0                      | 55.8                       | 49.0                          | 49.7                          | 65.0                          | 68.3                          |
| 49.0                      | 56.7                       | 50.0                          | 50.6                          | 65.9                          | 69.4                          |

Table S2 Continued . . .

| Referent<br>AHI <sub>4</sub> | Predicted<br>AHI <sub>3a</sub> | Lower 95%<br>prediction interval | Lower 90%<br>prediction interval | Upper 90%<br>prediction interval | Upper 95%<br>prediction interval |
|------------------------------|--------------------------------|----------------------------------|----------------------------------|----------------------------------|----------------------------------|
| 50.0                         | 57.6                           | 50.9                             | 51.5                             | 66.9                             | 70.5                             |
| 51.0                         | 58.5                           | 51.8                             | 52.4                             | 67.9                             | 71.5                             |
| 52.0                         | 59.4                           | 52.7                             | 53.4                             | 68.9                             | 72.6                             |
| 53.0                         | 60.3                           | 53.6                             | 54.3                             | 69.8                             | 73.6                             |
| 54.0                         | 61.2                           | 54.5                             | 55.2                             | 70.8                             | 74.7                             |
| 55.0                         | 62.1                           | 55.5                             | 56.1                             | 71.8                             | 75.7                             |
| 56.0                         | 63.0                           | 56.4                             | 57.1                             | 72.7                             | 76.7                             |
| 57.0                         | 63.9                           | 57.3                             | 58.0                             | 73.7                             | 77.7                             |
| 58.0                         | 64.8                           | 58.2                             | 58.9                             | 74.6                             | 78.7                             |
| 59.0                         | 65.7                           | 59.1                             | 59.8                             | 75.6                             | 79.7                             |
| 60.0                         | 66.7                           | 60.0                             | 60.7                             | 76.5                             | 80.7                             |
| 61.0                         | 67.6                           | 61.0                             | 61.7                             | 77.5                             | 81.7                             |
| 62.0                         | 68.5                           | 61.9                             | 62.6                             | 78.4                             | 82.6                             |
| 63.0                         | 69.4                           | 62.8                             | 63.5                             | 79.4                             | 83.6                             |
| 64.0                         | 70.3                           | 63.7                             | 64.4                             | 80.3                             | 84.6                             |
| 65.0                         | 71.2                           | 64.6                             | 65.3                             | 81.2                             | 85.5                             |
| 66.0                         | 72.1                           | 65.6                             | 66.3                             | 82.2                             | 86.5                             |
| 67.0                         | 73.1                           | 66.5                             | 67.2                             | 83.1                             | 87.4                             |
| 68.0                         | 74.0                           | 67.4                             | 68.1                             | 84.0                             | 88.3                             |
| 69.0                         | 74.9                           | 68.3                             | 69.0                             | 84.9                             | 89.3                             |
| 70.0                         | 75.8                           | 69.2                             | 70.0                             | 85.9                             | 90.2                             |
| 71.0                         | 76.7                           | 70.2                             | 70.9                             | 86.8                             | 91.1                             |
| 72.0                         | 77.7                           | 71.1                             | 71.8                             | 87.7                             | 92.1                             |
| 73.0                         | 78.6                           | 72.0                             | 72.7                             | 88.6                             | 93.0                             |
| 74.0                         | 79.5                           | 72.9                             | 73.7                             | 89.6                             | 93.9                             |
| 75.0                         | 80.5                           | 73.9                             | 74.6                             | 90.5                             | 94.8                             |
| 76.0                         | 81.4                           | 74.8                             | 75.5                             | 91.4                             | 95.7                             |
| 77.0                         | 82.3                           | 75.7                             | 76.4                             | 92.3                             | 96.6                             |
| 78.0                         | 83.3                           | 76.7                             | 77.4                             | 93.2                             | 97.5                             |
| 79.0                         | 84.2                           | 77.6                             | 78.3                             | 94.1                             | 98.4                             |
| 80.0                         | 85.1                           | 78.5                             | 79.2                             | 95.1                             | 99.3                             |
| 81.0                         | 86.1                           | 79.5                             | 80.2                             | 96.0                             | 100.2                            |
| 82.0                         | 87.0                           | 80.4                             | 81.1                             | 96.9                             | 101.0                            |
| 83.0                         | 87.9                           | 81.3                             | 82.0                             | 97.8                             | 102.0                            |
| 84.0                         | 88.9                           | 82.3                             | 83.0                             | 98.7                             | 102.9                            |
| 85.0                         | 89.8                           | 83.2                             | 83.9                             | 99.6                             | 103.7                            |
| 86.0                         | 90.8                           | 84.1                             | 84.8                             | 100.6                            | 104.6                            |
| 87.0                         | 91.7                           | 85.1                             | 85.8                             | 101.5                            | 105.5                            |
| 88.0                         | 92.7                           | 86.0                             | 86.7                             | 102.4                            | 106.4                            |
| 89.0                         | 93.6                           | 87.0                             | 87.6                             | 103.3                            | 107.2                            |
| 90.0                         | 94.6                           | 87.9                             | 88.6                             | 104.2                            | 108.1                            |
| 91.0                         | 95.5                           | 88.9                             | 89.5                             | 105.1                            | 109.0                            |
| 92.0                         | 96.5                           | 89.8                             | 90.5                             | 106.0                            | 109.9                            |
| 93.0                         | 97.4                           | 90.8                             | 91.4                             | 107.0                            | 110.8                            |
| 94.0                         | 98.4                           | 91.7                             | 92.4                             | 107.9                            | 111.7                            |
| 95.0                         | 99.4                           | 92.7                             | 93.3                             | 108.9                            | 112.7                            |
| 96.0                         | 100.3                          | 93.6                             | 94.3                             | 109.9                            | 113.6                            |
| 97.0                         | 101.3                          | 94.6                             | 95.2                             | 110.6                            | 114.1                            |
| 98.0                         | 102.3                          | 95.5                             | 96.2                             | 111.6                            | 115.1                            |
| 99.0                         | 103.2                          | 96.5                             | 97.1                             | 112.5                            | 116.1                            |
| 100.0                        | 104.2                          | 97.5                             | 98.1                             | 113.5                            | 117.0                            |

**Table S3. Predicted AHI<sub>3a</sub> with associated 90% and 95% prediction interval using an AHI<sub>3</sub> referent**

| Referent AHI <sub>3</sub> | Predicted AHI <sub>3a</sub> | Lower 95% Prediction Interval | Lower 90% Prediction Interval | Upper 90% Prediction Interval | Upper 95% Prediction Interval |
|---------------------------|-----------------------------|-------------------------------|-------------------------------|-------------------------------|-------------------------------|
| 0.0                       | 1.7                         | 0.0                           | 0.0                           | 4.9                           | 5.0                           |
| 1.0                       | 3.0                         | 1.1                           | 1.2                           | 5.7                           | 7.7                           |
| 2.0                       | 4.3                         | 2.1                           | 2.2                           | 8.8                           | 11.0                          |
| 3.0                       | 5.7                         | 3.1                           | 3.3                           | 9.5                           | 11.9                          |
| 4.0                       | 6.9                         | 4.3                           | 4.5                           | 11.3                          | 13.1                          |
| 5.0                       | 8.1                         | 5.3                           | 5.5                           | 12.9                          | 15.4                          |
| 6.0                       | 9.3                         | 6.2                           | 6.5                           | 14.2                          | 16.7                          |
| 7.0                       | 10.4                        | 7.1                           | 7.3                           | 14.9                          | 16.1                          |
| 8.0                       | 11.5                        | 8.4                           | 8.6                           | 17.4                          | 19.6                          |
| 9.0                       | 12.5                        | 9.0                           | 9.4                           | 17.1                          | 19.1                          |
| 10.0                      | 13.6                        | 10.0                          | 10.5                          | 17.7                          | 18.5                          |
| 11.0                      | 14.6                        | 11.4                          | 11.6                          | 20.0                          | 22.9                          |
| 12.0                      | 15.7                        | 12.0                          | 12.4                          | 20.8                          | 25.3                          |
| 13.0                      | 16.7                        | 13.2                          | 13.5                          | 21.9                          | 24.8                          |
| 14.0                      | 17.8                        | 14.4                          | 14.7                          | 22.9                          | 23.3                          |
| 15.0                      | 18.8                        | 15.3                          | 15.6                          | 23.9                          | 25.6                          |
| 16.0                      | 19.8                        | 16.4                          | 16.6                          | 25.2                          | 27.3                          |
| 17.0                      | 20.8                        | 17.5                          | 17.6                          | 27.1                          | 30.3                          |
| 18.0                      | 21.8                        | 18.3                          | 18.5                          | 27.8                          | 30.9                          |
| 19.0                      | 22.8                        | 19.0                          | 19.5                          | 27.8                          | 29.9                          |
| 20.0                      | 23.8                        | 20.1                          | 20.5                          | 29.3                          | 31.0                          |
| 21.0                      | 24.9                        | 21.3                          | 21.6                          | 31.2                          | 32.7                          |
| 22.0                      | 25.9                        | 22.5                          | 22.6                          | 32.6                          | 33.7                          |
| 23.0                      | 27.0                        | 23.5                          | 23.7                          | 33.5                          | 34.6                          |
| 24.0                      | 28.1                        | 24.4                          | 24.8                          | 34.2                          | 35.7                          |
| 25.0                      | 29.1                        | 25.4                          | 25.9                          | 35.0                          | 37.0                          |
| 26.0                      | 30.2                        | 26.3                          | 26.8                          | 36.1                          | 38.3                          |
| 27.0                      | 31.2                        | 27.3                          | 27.6                          | 37.1                          | 39.6                          |
| 28.0                      | 32.3                        | 28.2                          | 28.5                          | 38.1                          | 40.9                          |
| 29.0                      | 33.3                        | 29.2                          | 29.4                          | 39.0                          | 42.0                          |
| 30.0                      | 34.3                        | 30.2                          | 30.4                          | 40.0                          | 43.0                          |
| 31.0                      | 35.3                        | 31.1                          | 31.4                          | 41.1                          | 43.9                          |
| 32.0                      | 36.2                        | 32.1                          | 32.4                          | 42.4                          | 44.8                          |
| 33.0                      | 37.2                        | 33.2                          | 33.4                          | 43.8                          | 45.6                          |
| 34.0                      | 38.2                        | 34.2                          | 34.5                          | 45.1                          | 46.3                          |
| 35.0                      | 39.1                        | 35.2                          | 35.5                          | 46.1                          | 47.0                          |
| 36.0                      | 40.1                        | 36.2                          | 36.5                          | 47.0                          | 47.7                          |
| 37.0                      | 41.0                        | 37.2                          | 37.4                          | 47.7                          | 48.4                          |
| 38.0                      | 42.0                        | 38.2                          | 38.4                          | 48.4                          | 49.1                          |
| 39.0                      | 42.9                        | 39.1                          | 39.4                          | 49.0                          | 49.8                          |
| 40.0                      | 43.8                        | 40.1                          | 40.4                          | 49.7                          | 50.6                          |
| 41.0                      | 44.8                        | 41.1                          | 41.3                          | 50.4                          | 51.4                          |
| 42.0                      | 45.7                        | 42.1                          | 42.3                          | 51.2                          | 52.2                          |
| 43.0                      | 46.6                        | 43.1                          | 43.3                          | 52.1                          | 53.1                          |
| 44.0                      | 47.6                        | 44.1                          | 44.3                          | 53.0                          | 54.0                          |
| 45.0                      | 48.5                        | 45.1                          | 45.3                          | 53.9                          | 54.9                          |
| 46.0                      | 49.5                        | 46.1                          | 46.3                          | 54.8                          | 55.8                          |
| 47.0                      | 50.4                        | 47.1                          | 47.3                          | 55.7                          | 56.7                          |
| 48.0                      | 51.4                        | 48.1                          | 48.3                          | 56.7                          | 57.6                          |
| 49.0                      | 52.3                        | 49.1                          | 49.3                          | 57.6                          | 58.6                          |

Table S3 Continued . . .

| Referent<br>AHI <sub>s</sub> | Predicted<br>AHI <sub>3a</sub> | Lower 95%<br>prediction interval | Lower 90%<br>prediction interval | Upper 90%<br>prediction interval | Upper 95%<br>prediction interval |
|------------------------------|--------------------------------|----------------------------------|----------------------------------|----------------------------------|----------------------------------|
| 50.0                         | 53.2                           | 50.1                             | 50.3                             | 58.5                             | 59.5                             |
| 51.0                         | 54.2                           | 51.0                             | 51.3                             | 59.4                             | 60.5                             |
| 52.0                         | 55.1                           | 52.0                             | 52.3                             | 60.4                             | 61.4                             |
| 53.0                         | 56.1                           | 53.0                             | 53.3                             | 61.3                             | 62.4                             |
| 54.0                         | 57.0                           | 54.0                             | 54.2                             | 62.2                             | 63.4                             |
| 55.0                         | 58.0                           | 55.0                             | 55.2                             | 63.1                             | 64.3                             |
| 56.0                         | 59.0                           | 56.0                             | 56.2                             | 64.1                             | 65.3                             |
| 57.0                         | 59.9                           | 57.0                             | 57.2                             | 65.0                             | 66.3                             |
| 58.0                         | 60.9                           | 58.0                             | 58.2                             | 65.9                             | 67.2                             |
| 59.0                         | 61.8                           | 58.9                             | 59.2                             | 66.9                             | 68.2                             |
| 60.0                         | 62.8                           | 59.9                             | 60.2                             | 67.8                             | 69.2                             |
| 61.0                         | 63.8                           | 60.9                             | 61.2                             | 68.8                             | 70.2                             |
| 62.0                         | 64.7                           | 61.9                             | 62.2                             | 69.7                             | 71.1                             |
| 63.0                         | 65.7                           | 62.9                             | 63.1                             | 70.7                             | 72.1                             |
| 64.0                         | 66.7                           | 63.9                             | 64.1                             | 71.6                             | 73.1                             |
| 65.0                         | 67.6                           | 64.9                             | 65.1                             | 72.6                             | 74.1                             |
| 66.0                         | 68.6                           | 65.8                             | 66.1                             | 73.5                             | 75.0                             |
| 67.0                         | 69.6                           | 66.8                             | 67.1                             | 74.5                             | 76.0                             |
| 68.0                         | 70.5                           | 67.8                             | 68.1                             | 75.5                             | 77.0                             |
| 69.0                         | 71.5                           | 68.8                             | 69.1                             | 76.4                             | 78.0                             |
| 70.0                         | 72.5                           | 69.8                             | 70.0                             | 77.4                             | 79.0                             |
| 71.0                         | 73.5                           | 70.8                             | 71.0                             | 78.4                             | 79.9                             |
| 72.0                         | 74.4                           | 71.7                             | 72.0                             | 79.3                             | 80.9                             |
| 73.0                         | 75.4                           | 72.7                             | 73.0                             | 80.3                             | 81.9                             |
| 74.0                         | 76.4                           | 73.7                             | 74.0                             | 81.3                             | 82.9                             |
| 75.0                         | 77.4                           | 74.7                             | 75.0                             | 82.2                             | 83.9                             |
| 76.0                         | 78.4                           | 75.7                             | 76.0                             | 83.2                             | 84.8                             |
| 77.0                         | 79.3                           | 76.7                             | 76.9                             | 84.2                             | 85.8                             |
| 78.0                         | 80.3                           | 77.6                             | 77.9                             | 85.2                             | 86.8                             |
| 79.0                         | 81.3                           | 78.6                             | 78.9                             | 86.2                             | 87.8                             |
| 80.0                         | 82.3                           | 79.6                             | 79.9                             | 87.2                             | 88.8                             |
| 81.0                         | 83.3                           | 80.6                             | 80.9                             | 88.1                             | 89.8                             |
| 82.0                         | 84.3                           | 81.6                             | 81.8                             | 89.1                             | 90.7                             |
| 83.0                         | 85.2                           | 82.6                             | 82.8                             | 90.1                             | 91.7                             |
| 84.0                         | 86.2                           | 83.5                             | 83.8                             | 91.1                             | 92.7                             |
| 85.0                         | 87.2                           | 84.5                             | 84.8                             | 92.1                             | 93.7                             |
| 86.0                         | 88.2                           | 85.5                             | 85.8                             | 93.1                             | 94.7                             |
| 87.0                         | 89.2                           | 86.5                             | 86.7                             | 94.1                             | 95.7                             |
| 88.0                         | 90.2                           | 87.5                             | 87.7                             | 95.1                             | 96.6                             |
| 89.0                         | 91.2                           | 88.4                             | 88.7                             | 96.1                             | 97.6                             |
| 90.0                         | 92.2                           | 89.4                             | 89.7                             | 97.1                             | 98.6                             |
| 91.0                         | 93.1                           | 90.4                             | 90.7                             | 98.1                             | 99.6                             |
| 92.0                         | 94.1                           | 91.4                             | 91.6                             | 99.1                             | 100.6                            |
| 93.0                         | 95.1                           | 92.3                             | 92.6                             | 100.1                            | 101.5                            |
| 94.0                         | 96.1                           | 93.3                             | 93.6                             | 101.0                            | 102.5                            |
| 95.0                         | 97.1                           | 94.3                             | 94.6                             | 102.0                            | 103.5                            |
| 96.0                         | 98.1                           | 95.3                             | 95.5                             | 103.0                            | 104.5                            |
| 97.0                         | 99.1                           | 96.3                             | 96.5                             | 104.0                            | 105.5                            |
| 98.0                         | 100.1                          | 97.2                             | 97.5                             | 105.0                            | 106.5                            |
| 99.0                         | 101.0                          | 98.2                             | 98.5                             | 106.0                            | 107.4                            |
| 100.0                        | 102.0                          | 99.2                             | 99.4                             | 107.0                            | 108.4                            |

**Table S4. Predicted AHI<sub>4</sub> with associated 90% and 95% prediction interval using an AHI<sub>3</sub> referent**

| Referent AHI <sub>3</sub> | Predicted AHI <sub>4</sub> | Lower 95% prediction interval | Lower 90% prediction interval | Upper 90% prediction interval | Upper 95% prediction interval |
|---------------------------|----------------------------|-------------------------------|-------------------------------|-------------------------------|-------------------------------|
| 0.0                       | 0.0                        | 0.0                           | 0.0                           | 0.1                           | 0.2                           |
| 1.0                       | 0.4                        | 0.0                           | 0.0                           | 0.9                           | 0.9                           |
| 2.0                       | 0.9                        | 0.2                           | 0.3                           | 1.6                           | 1.8                           |
| 3.0                       | 1.4                        | 0.4                           | 0.4                           | 2.2                           | 2.4                           |
| 4.0                       | 1.9                        | 0.7                           | 0.8                           | 3.0                           | 3.2                           |
| 5.0                       | 2.5                        | 0.8                           | 1.0                           | 4.0                           | 4.2                           |
| 6.0                       | 3.0                        | 1.5                           | 1.7                           | 4.8                           | 5.3                           |
| 7.0                       | 3.6                        | 1.8                           | 1.9                           | 5.3                           | 5.7                           |
| 8.0                       | 4.3                        | 2.2                           | 2.5                           | 6.2                           | 6.5                           |
| 9.0                       | 5.0                        | 2.6                           | 2.9                           | 7.3                           | 7.5                           |
| 10.0                      | 5.7                        | 3.2                           | 3.5                           | 7.9                           | 8.2                           |
| 11.0                      | 6.4                        | 3.6                           | 3.9                           | 8.6                           | 9.1                           |
| 12.0                      | 7.1                        | 4.3                           | 4.6                           | 9.9                           | 10.3                          |
| 13.0                      | 7.8                        | 4.7                           | 5.0                           | 10.7                          | 11.1                          |
| 14.0                      | 8.6                        | 5.1                           | 5.3                           | 11.5                          | 12.0                          |
| 15.0                      | 9.3                        | 5.6                           | 6.2                           | 12.5                          | 13.1                          |
| 16.0                      | 10.1                       | 6.2                           | 6.9                           | 13.6                          | 14.2                          |
| 17.0                      | 11.0                       | 7.0                           | 7.7                           | 14.7                          | 15.4                          |
| 18.0                      | 11.8                       | 7.4                           | 8.2                           | 15.6                          | 16.2                          |
| 19.0                      | 12.5                       | 7.5                           | 8.5                           | 16.3                          | 16.7                          |
| 20.0                      | 13.3                       | 7.9                           | 9.1                           | 17.2                          | 17.6                          |
| 21.0                      | 14.1                       | 8.4                           | 9.8                           | 18.2                          | 18.8                          |
| 22.0                      | 14.8                       | 8.7                           | 10.3                          | 19.1                          | 19.7                          |
| 23.0                      | 15.6                       | 9.2                           | 10.7                          | 19.9                          | 20.5                          |
| 24.0                      | 16.3                       | 9.9                           | 10.9                          | 20.6                          | 21.1                          |
| 25.0                      | 17.1                       | 10.6                          | 11.4                          | 21.5                          | 22.0                          |
| 26.0                      | 18.0                       | 11.3                          | 12.2                          | 22.6                          | 23.0                          |
| 27.0                      | 18.8                       | 12.0                          | 13.0                          | 23.8                          | 24.2                          |
| 28.0                      | 19.7                       | 12.7                          | 13.8                          | 25.0                          | 25.5                          |
| 29.0                      | 20.6                       | 13.4                          | 14.5                          | 26.2                          | 26.7                          |
| 30.0                      | 21.4                       | 14.1                          | 15.2                          | 27.3                          | 27.7                          |
| 31.0                      | 22.2                       | 14.8                          | 15.8                          | 28.0                          | 28.5                          |
| 32.0                      | 23.0                       | 15.4                          | 16.5                          | 28.5                          | 29.1                          |
| 33.0                      | 23.8                       | 16.1                          | 17.1                          | 29.0                          | 29.7                          |
| 34.0                      | 24.5                       | 16.7                          | 17.8                          | 29.6                          | 30.4                          |
| 35.0                      | 25.4                       | 17.3                          | 18.5                          | 30.5                          | 31.3                          |
| 36.0                      | 26.3                       | 18.0                          | 19.2                          | 31.6                          | 32.5                          |
| 37.0                      | 27.2                       | 18.6                          | 20.0                          | 33.0                          | 33.9                          |
| 38.0                      | 28.2                       | 19.3                          | 20.8                          | 34.5                          | 35.3                          |
| 39.0                      | 29.2                       | 20.0                          | 21.6                          | 35.9                          | 36.8                          |
| 40.0                      | 30.3                       | 20.8                          | 22.5                          | 37.3                          | 38.1                          |
| 41.0                      | 31.3                       | 21.6                          | 23.3                          | 38.7                          | 39.4                          |
| 42.0                      | 32.4                       | 22.4                          | 24.2                          | 39.9                          | 40.6                          |
| 43.0                      | 33.5                       | 23.2                          | 25.1                          | 41.1                          | 41.8                          |
| 44.0                      | 34.5                       | 24.1                          | 26.0                          | 42.2                          | 42.9                          |
| 45.0                      | 35.6                       | 25.0                          | 26.9                          | 43.2                          | 44.0                          |
| 46.0                      | 36.7                       | 25.9                          | 27.8                          | 44.3                          | 45.0                          |
| 47.0                      | 37.8                       | 26.8                          | 28.7                          | 45.3                          | 46.1                          |
| 48.0                      | 38.8                       | 27.7                          | 29.7                          | 46.4                          | 47.1                          |
| 49.0                      | 39.9                       | 28.6                          | 30.6                          | 47.4                          | 48.1                          |

Table S4 Continued . . .

| Referent<br>AHI <sub>3</sub> | Predicted<br>AHI <sub>4</sub> | Lower 90%<br>prediction interval | Upper 90%<br>prediction interval | Lower 95%<br>prediction interval | Upper 95%<br>prediction interval |
|------------------------------|-------------------------------|----------------------------------|----------------------------------|----------------------------------|----------------------------------|
| 50.0                         | 41.0                          | 29.5                             | 31.5                             | 48.5                             | 49.1                             |
| 51.0                         | 42.1                          | 30.4                             | 32.5                             | 49.5                             | 50.2                             |
| 52.0                         | 43.1                          | 31.3                             | 33.4                             | 50.5                             | 51.2                             |
| 53.0                         | 44.2                          | 32.2                             | 34.3                             | 51.6                             | 52.2                             |
| 54.0                         | 45.2                          | 33.1                             | 35.3                             | 52.6                             | 53.2                             |
| 55.0                         | 46.3                          | 34.1                             | 36.2                             | 53.6                             | 54.3                             |
| 56.0                         | 47.4                          | 35.0                             | 37.2                             | 54.7                             | 55.3                             |
| 57.0                         | 48.4                          | 36.0                             | 38.2                             | 55.7                             | 56.3                             |
| 58.0                         | 49.5                          | 36.9                             | 39.1                             | 56.7                             | 57.3                             |
| 59.0                         | 50.5                          | 37.9                             | 40.1                             | 57.8                             | 58.3                             |
| 60.0                         | 51.6                          | 38.8                             | 41.0                             | 58.8                             | 59.4                             |
| 61.0                         | 52.6                          | 39.8                             | 42.0                             | 59.8                             | 60.4                             |
| 62.0                         | 53.7                          | 40.8                             | 43.0                             | 60.9                             | 61.4                             |
| 63.0                         | 54.7                          | 41.7                             | 44.0                             | 61.9                             | 62.4                             |
| 64.0                         | 55.8                          | 42.7                             | 45.0                             | 62.9                             | 63.5                             |
| 65.0                         | 56.8                          | 43.7                             | 46.0                             | 64.0                             | 64.5                             |
| 66.0                         | 57.9                          | 44.7                             | 47.0                             | 65.0                             | 65.5                             |
| 67.0                         | 58.9                          | 45.7                             | 48.0                             | 66.0                             | 66.5                             |
| 68.0                         | 60.0                          | 46.7                             | 49.0                             | 67.1                             | 67.6                             |
| 69.0                         | 61.0                          | 47.7                             | 50.0                             | 68.1                             | 68.6                             |
| 70.0                         | 62.0                          | 48.7                             | 51.0                             | 69.1                             | 69.6                             |
| 71.0                         | 63.1                          | 49.7                             | 52.0                             | 70.2                             | 70.7                             |
| 72.0                         | 64.1                          | 50.7                             | 53.0                             | 71.2                             | 71.7                             |
| 73.0                         | 65.2                          | 51.7                             | 54.0                             | 72.2                             | 72.7                             |
| 74.0                         | 66.2                          | 52.7                             | 55.1                             | 73.3                             | 73.8                             |
| 75.0                         | 67.2                          | 53.8                             | 56.1                             | 74.3                             | 74.8                             |
| 76.0                         | 68.3                          | 54.8                             | 57.1                             | 75.3                             | 75.8                             |
| 77.0                         | 69.3                          | 55.8                             | 58.1                             | 76.4                             | 76.9                             |
| 78.0                         | 70.3                          | 56.8                             | 59.2                             | 77.4                             | 77.9                             |
| 79.0                         | 71.4                          | 57.9                             | 60.2                             | 78.4                             | 78.9                             |
| 80.0                         | 72.4                          | 58.9                             | 61.3                             | 79.5                             | 80.0                             |
| 81.0                         | 73.4                          | 60.0                             | 62.3                             | 80.5                             | 81.0                             |
| 82.0                         | 74.5                          | 61.0                             | 63.3                             | 81.5                             | 82.0                             |
| 83.0                         | 75.5                          | 62.0                             | 64.4                             | 82.6                             | 83.1                             |
| 84.0                         | 76.5                          | 63.1                             | 65.4                             | 83.6                             | 84.1                             |
| 85.0                         | 77.6                          | 64.1                             | 66.5                             | 84.6                             | 85.1                             |
| 86.0                         | 78.6                          | 65.2                             | 67.5                             | 85.7                             | 86.2                             |
| 87.0                         | 79.6                          | 66.2                             | 68.6                             | 86.7                             | 87.2                             |
| 88.0                         | 80.6                          | 67.3                             | 69.6                             | 87.7                             | 88.2                             |
| 89.0                         | 81.7                          | 68.4                             | 70.7                             | 88.8                             | 89.3                             |
| 90.0                         | 82.7                          | 69.4                             | 71.7                             | 89.8                             | 90.3                             |
| 91.0                         | 83.7                          | 70.5                             | 72.8                             | 90.8                             | 91.4                             |
| 92.0                         | 84.7                          | 71.5                             | 73.8                             | 91.9                             | 92.4                             |
| 93.0                         | 85.8                          | 72.6                             | 74.9                             | 92.9                             | 93.4                             |
| 94.0                         | 86.8                          | 73.7                             | 75.9                             | 93.9                             | 94.5                             |
| 95.0                         | 87.8                          | 74.7                             | 77.0                             | 95.0                             | 95.5                             |
| 96.0                         | 88.8                          | 75.8                             | 78.1                             | 96.0                             | 96.5                             |
| 97.0                         | 89.8                          | 76.8                             | 79.1                             | 97.0                             | 97.5                             |
| 98.0                         | 90.9                          | 77.9                             | 80.2                             | 98.1                             | 98.6                             |
| 99.0                         | 91.9                          | 79.0                             | 81.2                             | 99.1                             | 99.6                             |
| 100.0                        | 92.9                          | 80.0                             | 82.3                             | 100.1                            | 100.7                            |



**Table S5. Predicted AHI<sub>3</sub> with Associated 90% and 95% Prediction Interval Using an AHI<sub>3a</sub> Referent**

| Referent AHI <sub>3a</sub> | Predicted AHI <sub>3</sub> | Lower 95% prediction interval | Lower 90% prediction interval | Upper 90% prediction interval | Upper 95% prediction interval |
|----------------------------|----------------------------|-------------------------------|-------------------------------|-------------------------------|-------------------------------|
| 0.0                        | 0.0                        | 0.0                           | 0.0                           | 0.1                           | 0.2                           |
| 1.0                        | 0.3                        | 0.0                           | 0.0                           | 1.0                           | 1.1                           |
| 2.0                        | 1.0                        | 0.2                           | 0.3                           | 1.9                           | 2.0                           |
| 3.0                        | 1.7                        | 0.4                           | 0.4                           | 2.8                           | 3.0                           |
| 4.0                        | 2.4                        | 0.6                           | 0.7                           | 3.6                           | 3.8                           |
| 5.0                        | 3.1                        | 0.5                           | 0.9                           | 4.5                           | 4.7                           |
| 6.0                        | 3.8                        | 1.1                           | 1.6                           | 5.6                           | 5.8                           |
| 7.0                        | 4.6                        | 1.5                           | 1.7                           | 6.7                           | 6.9                           |
| 8.0                        | 5.3                        | 1.5                           | 2.2                           | 7.4                           | 7.7                           |
| 9.0                        | 6.1                        | 2.1                           | 2.7                           | 8.6                           | 8.9                           |
| 10.0                       | 6.9                        | 2.4                           | 3.4                           | 9.5                           | 9.9                           |
| 11.0                       | 7.7                        | 3.6                           | 4.0                           | 10.3                          | 10.5                          |
| 12.0                       | 8.6                        | 3.8                           | 4.5                           | 11.5                          | 11.9                          |
| 13.0                       | 9.4                        | 3.1                           | 4.9                           | 12.4                          | 12.7                          |
| 14.0                       | 10.3                       | 3.8                           | 5.6                           | 13.2                          | 13.5                          |
| 15.0                       | 11.1                       | 4.7                           | 6.4                           | 14.2                          | 14.5                          |
| 16.0                       | 12.0                       | 5.1                           | 6.9                           | 15.4                          | 15.6                          |
| 17.0                       | 13.0                       | 5.6                           | 7.6                           | 16.4                          | 16.6                          |
| 18.0                       | 13.9                       | 6.6                           | 8.6                           | 17.4                          | 17.6                          |
| 19.0                       | 14.9                       | 8.2                           | 10.0                          | 18.4                          | 18.7                          |
| 20.0                       | 15.8                       | 8.8                           | 10.6                          | 19.4                          | 19.6                          |
| 21.0                       | 16.7                       | 8.4                           | 10.4                          | 20.6                          | 20.7                          |
| 22.0                       | 17.7                       | 9.4                           | 11.2                          | 21.3                          | 21.4                          |
| 23.0                       | 18.6                       | 11.1                          | 12.6                          | 22.0                          | 22.2                          |
| 24.0                       | 19.6                       | 11.9                          | 13.3                          | 22.9                          | 23.2                          |
| 25.0                       | 20.5                       | 11.8                          | 13.2                          | 23.9                          | 24.3                          |
| 26.0                       | 21.5                       | 11.9                          | 13.3                          | 24.9                          | 25.4                          |
| 27.0                       | 22.4                       | 13.1                          | 14.6                          | 26.0                          | 26.6                          |
| 28.0                       | 23.4                       | 15.0                          | 16.8                          | 27.2                          | 27.7                          |
| 29.0                       | 24.4                       | 16.4                          | 18.4                          | 28.4                          | 28.8                          |
| 30.0                       | 25.3                       | 16.7                          | 19.0                          | 29.4                          | 29.9                          |
| 31.0                       | 26.3                       | 16.4                          | 19.1                          | 30.4                          | 30.8                          |
| 32.0                       | 27.2                       | 16.2                          | 19.3                          | 31.4                          | 31.8                          |
| 33.0                       | 28.1                       | 16.2                          | 19.7                          | 32.5                          | 32.7                          |
| 34.0                       | 29.1                       | 16.6                          | 20.4                          | 33.5                          | 33.7                          |
| 35.0                       | 30.0                       | 17.4                          | 21.2                          | 34.5                          | 34.7                          |
| 36.0                       | 31.0                       | 18.7                          | 22.1                          | 35.4                          | 35.7                          |
| 37.0                       | 32.0                       | 20.2                          | 23.2                          | 36.4                          | 36.7                          |
| 38.0                       | 33.0                       | 21.9                          | 24.3                          | 37.4                          | 37.7                          |
| 39.0                       | 34.0                       | 23.4                          | 25.5                          | 38.4                          | 38.7                          |
| 40.0                       | 35.1                       | 24.8                          | 26.7                          | 39.4                          | 39.8                          |
| 41.0                       | 36.1                       | 26.0                          | 28.0                          | 40.5                          | 40.8                          |
| 42.0                       | 37.1                       | 27.2                          | 29.3                          | 41.5                          | 41.8                          |
| 43.0                       | 38.2                       | 28.4                          | 30.5                          | 42.5                          | 42.8                          |
| 44.0                       | 39.2                       | 29.6                          | 31.8                          | 43.6                          | 43.8                          |
| 45.0                       | 40.3                       | 30.7                          | 33.0                          | 44.6                          | 44.8                          |
| 46.0                       | 41.4                       | 31.9                          | 34.2                          | 45.6                          | 45.9                          |
| 47.0                       | 42.4                       | 33.0                          | 35.4                          | 46.7                          | 46.9                          |
| 48.0                       | 43.5                       | 34.2                          | 36.6                          | 47.7                          | 47.9                          |
| 49.0                       | 44.6                       | 35.3                          | 37.8                          | 48.7                          | 48.9                          |

Table S5 Continued . . .

| Referent<br>AHI <sub>3a</sub> | Predicted<br>AHI <sub>3</sub> | Lower 95%<br>prediction interval | Lower 90%<br>prediction interval | Upper 90%<br>prediction interval | Upper 95%<br>prediction interval |
|-------------------------------|-------------------------------|----------------------------------|----------------------------------|----------------------------------|----------------------------------|
| 50.0                          | 45.6                          | 36.4                             | 38.9                             | 49.7                             | 49.9                             |
| 51.0                          | 46.7                          | 37.5                             | 40.1                             | 50.7                             | 50.9                             |
| 52.0                          | 47.8                          | 38.6                             | 41.2                             | 51.7                             | 52.0                             |
| 53.0                          | 48.8                          | 39.7                             | 42.4                             | 52.7                             | 53.0                             |
| 54.0                          | 49.9                          | 40.7                             | 43.5                             | 53.7                             | 54.0                             |
| 55.0                          | 51.0                          | 41.8                             | 44.6                             | 54.7                             | 55.0                             |
| 56.0                          | 52.0                          | 42.8                             | 45.7                             | 55.8                             | 56.0                             |
| 57.0                          | 53.1                          | 43.8                             | 46.8                             | 56.8                             | 57.0                             |
| 58.0                          | 54.1                          | 44.8                             | 47.9                             | 57.8                             | 58.0                             |
| 59.0                          | 55.2                          | 45.8                             | 48.9                             | 58.8                             | 59.0                             |
| 60.0                          | 56.3                          | 46.9                             | 50.0                             | 59.8                             | 60.1                             |
| 61.0                          | 57.3                          | 47.9                             | 51.1                             | 60.8                             | 61.1                             |
| 62.0                          | 58.4                          | 48.9                             | 52.2                             | 61.8                             | 62.1                             |
| 63.0                          | 59.4                          | 49.9                             | 53.2                             | 62.8                             | 63.1                             |
| 64.0                          | 60.5                          | 50.9                             | 54.3                             | 63.9                             | 64.1                             |
| 65.0                          | 61.5                          | 51.9                             | 55.3                             | 64.9                             | 65.1                             |
| 66.0                          | 62.6                          | 52.9                             | 56.4                             | 65.9                             | 66.2                             |
| 67.0                          | 63.6                          | 53.9                             | 57.5                             | 66.9                             | 67.2                             |
| 68.0                          | 64.7                          | 54.9                             | 58.5                             | 67.9                             | 68.2                             |
| 69.0                          | 65.7                          | 56.0                             | 59.6                             | 68.9                             | 69.2                             |
| 70.0                          | 66.7                          | 57.0                             | 60.6                             | 70.0                             | 70.3                             |
| 71.0                          | 67.8                          | 58.0                             | 61.7                             | 71.0                             | 71.3                             |
| 72.0                          | 68.8                          | 59.0                             | 62.7                             | 72.0                             | 72.3                             |
| 73.0                          | 69.9                          | 60.0                             | 63.8                             | 73.0                             | 73.3                             |
| 74.0                          | 70.9                          | 61.1                             | 64.8                             | 74.1                             | 74.4                             |
| 75.0                          | 71.9                          | 62.1                             | 65.8                             | 75.1                             | 75.4                             |
| 76.0                          | 73.0                          | 63.1                             | 66.9                             | 76.1                             | 76.4                             |
| 77.0                          | 74.0                          | 64.1                             | 67.9                             | 77.1                             | 77.4                             |
| 78.0                          | 75.0                          | 65.2                             | 69.0                             | 78.2                             | 78.5                             |
| 79.0                          | 76.1                          | 66.2                             | 70.0                             | 79.2                             | 79.5                             |
| 80.0                          | 77.1                          | 67.2                             | 71.0                             | 80.2                             | 80.5                             |
| 81.0                          | 78.1                          | 68.3                             | 72.1                             | 81.3                             | 81.6                             |
| 82.0                          | 79.2                          | 69.3                             | 73.1                             | 82.3                             | 82.6                             |
| 83.0                          | 80.2                          | 70.3                             | 74.1                             | 83.3                             | 83.6                             |
| 84.0                          | 81.2                          | 71.4                             | 75.1                             | 84.4                             | 84.7                             |
| 85.0                          | 82.3                          | 72.4                             | 76.2                             | 85.4                             | 85.7                             |
| 86.0                          | 83.3                          | 73.4                             | 77.2                             | 86.4                             | 86.7                             |
| 87.0                          | 84.3                          | 74.5                             | 78.2                             | 87.5                             | 87.7                             |
| 88.0                          | 85.3                          | 75.5                             | 79.2                             | 88.5                             | 88.8                             |
| 89.0                          | 86.4                          | 76.5                             | 80.3                             | 89.5                             | 89.8                             |
| 90.0                          | 87.4                          | 77.6                             | 81.3                             | 90.5                             | 90.8                             |
| 91.0                          | 88.4                          | 78.6                             | 82.3                             | 91.6                             | 91.9                             |
| 92.0                          | 89.4                          | 79.7                             | 83.3                             | 92.6                             | 92.9                             |
| 93.0                          | 90.4                          | 80.7                             | 84.3                             | 93.7                             | 94.0                             |
| 94.0                          | 91.5                          | 81.7                             | 85.4                             | 94.7                             | 95.0                             |
| 95.0                          | 92.5                          | 82.8                             | 86.4                             | 95.7                             | 96.0                             |
| 96.0                          | 93.5                          | 83.8                             | 87.4                             | 96.8                             | 97.1                             |
| 97.0                          | 94.5                          | 84.9                             | 88.4                             | 97.8                             | 98.1                             |
| 98.0                          | 95.6                          | 85.9                             | 89.4                             | 98.9                             | 99.1                             |
| 99.0                          | 96.6                          | 87.0                             | 90.4                             | 99.9                             | 100.2                            |
| 100.0                         | 97.6                          | 88.0                             | 91.5                             | 100.9                            | 101.2                            |

**Table S6. Predicted AHI<sub>4</sub> with associated 90% and 95% prediction interval using an AHI<sub>3a</sub> referent**

| Referent AHI <sub>3a</sub> | Predicted AHI <sub>4</sub> | Lower 95% prediction interval | Lower 90% prediction interval | Upper 90% prediction interval | Upper 95% prediction interval |
|----------------------------|----------------------------|-------------------------------|-------------------------------|-------------------------------|-------------------------------|
| 0.0                        | 0.0                        | 0.0                           | 0.0                           | 0.2                           | 0.3                           |
| 1.0                        | 0.0                        | 0.0                           | 0.0                           | 0.7                           | 0.8                           |
| 2.0                        | 0.4                        | 0.0                           | 0.0                           | 1.2                           | 1.3                           |
| 3.0                        | 0.8                        | 0.0                           | 0.1                           | 1.7                           | 1.9                           |
| 4.0                        | 1.1                        | 0.1                           | 0.2                           | 2.2                           | 2.3                           |
| 5.0                        | 1.5                        | 0.1                           | 0.3                           | 2.7                           | 3.2                           |
| 6.0                        | 1.9                        | 0.3                           | 0.4                           | 3.5                           | 3.8                           |
| 7.0                        | 2.3                        | 0.3                           | 0.5                           | 4.8                           | 5.1                           |
| 8.0                        | 2.7                        | 0.7                           | 1.1                           | 4.8                           | 5.1                           |
| 9.0                        | 3.2                        | 0.5                           | 0.8                           | 5.8                           | 6.4                           |
| 10.0                       | 3.7                        | 0.6                           | 1.0                           | 6.6                           | 7.0                           |
| 11.0                       | 4.2                        | 1.3                           | 1.6                           | 7.1                           | 7.5                           |
| 12.0                       | 4.8                        | 1.2                           | 1.8                           | 8.3                           | 8.8                           |
| 13.0                       | 5.4                        | 1.2                           | 1.8                           | 9.4                           | 9.9                           |
| 14.0                       | 6.0                        | 1.4                           | 2.0                           | 9.7                           | 10.3                          |
| 15.0                       | 6.6                        | 1.8                           | 2.4                           | 10.5                          | 11.1                          |
| 16.0                       | 7.3                        | 2.4                           | 2.9                           | 12.0                          | 12.6                          |
| 17.0                       | 7.9                        | 2.5                           | 3.2                           | 13.1                          | 13.5                          |
| 18.0                       | 8.6                        | 2.8                           | 3.6                           | 14.0                          | 14.4                          |
| 19.0                       | 9.4                        | 3.6                           | 4.4                           | 14.6                          | 15.5                          |
| 20.0                       | 10.1                       | 3.8                           | 4.7                           | 15.4                          | 16.2                          |
| 21.0                       | 10.8                       | 3.7                           | 4.6                           | 16.5                          | 16.6                          |
| 22.0                       | 11.5                       | 3.9                           | 5.5                           | 17.1                          | 17.5                          |
| 23.0                       | 12.3                       | 4.5                           | 6.7                           | 17.6                          | 18.5                          |
| 24.0                       | 13.0                       | 4.8                           | 7.1                           | 18.4                          | 19.3                          |
| 25.0                       | 13.7                       | 4.8                           | 6.6                           | 19.4                          | 20.2                          |
| 26.0                       | 14.4                       | 4.9                           | 6.2                           | 20.4                          | 21.1                          |
| 27.0                       | 15.2                       | 5.6                           | 6.9                           | 21.3                          | 22.1                          |
| 28.0                       | 15.9                       | 6.7                           | 8.3                           | 22.2                          | 23.2                          |
| 29.0                       | 16.7                       | 7.5                           | 9.3                           | 23.2                          | 24.3                          |
| 30.0                       | 17.5                       | 7.7                           | 9.6                           | 24.4                          | 25.5                          |
| 31.0                       | 18.3                       | 7.3                           | 9.2                           | 25.7                          | 26.6                          |
| 32.0                       | 19.0                       | 6.8                           | 8.8                           | 26.9                          | 27.6                          |
| 33.0                       | 19.8                       | 6.4                           | 8.5                           | 28.0                          | 28.4                          |
| 34.0                       | 20.5                       | 6.3                           | 8.5                           | 29.1                          | 29.3                          |
| 35.0                       | 21.2                       | 6.9                           | 9.2                           | 30.1                          | 30.5                          |
| 36.0                       | 22.0                       | 8.3                           | 10.5                          | 31.0                          | 32.1                          |
| 37.0                       | 22.9                       | 9.9                           | 12.2                          | 31.9                          | 33.8                          |
| 38.0                       | 23.7                       | 11.5                          | 13.7                          | 32.9                          | 35.4                          |
| 39.0                       | 24.6                       | 12.7                          | 14.9                          | 33.9                          | 36.9                          |
| 40.0                       | 25.6                       | 13.5                          | 15.7                          | 35.1                          | 38.1                          |
| 41.0                       | 26.6                       | 13.9                          | 16.2                          | 36.3                          | 39.2                          |
| 42.0                       | 27.6                       | 14.2                          | 16.6                          | 37.5                          | 40.1                          |
| 43.0                       | 28.6                       | 14.5                          | 16.9                          | 38.8                          | 41.0                          |
| 44.0                       | 29.6                       | 14.9                          | 17.4                          | 40.0                          | 41.9                          |
| 45.0                       | 30.6                       | 15.4                          | 18.0                          | 41.1                          | 42.9                          |
| 46.0                       | 31.7                       | 16.1                          | 18.7                          | 42.3                          | 43.9                          |
| 47.0                       | 32.8                       | 16.9                          | 19.5                          | 43.4                          | 44.9                          |
| 48.0                       | 33.9                       | 17.7                          | 20.4                          | 44.5                          | 45.9                          |
| 49.0                       | 35.0                       | 18.6                          | 21.3                          | 45.6                          | 47.0                          |

Table S6 Continued . . .

| Referent<br>AHI <sub>3a</sub> | Predicted<br>AHI <sub>4</sub> | Lower 90%<br>prediction interval | Upper 90%<br>prediction interval | Lower 95%<br>prediction interval | Upper 95%<br>prediction interval |
|-------------------------------|-------------------------------|----------------------------------|----------------------------------|----------------------------------|----------------------------------|
| 50.0                          | 36.1                          | 19.6                             | 22.3                             | 46.7                             | 48.0                             |
| 51.0                          | 37.2                          | 20.6                             | 23.3                             | 47.7                             | 49.0                             |
| 52.0                          | 38.3                          | 21.5                             | 24.3                             | 48.8                             | 50.1                             |
| 53.0                          | 39.4                          | 22.5                             | 25.3                             | 49.9                             | 51.1                             |
| 54.0                          | 40.5                          | 23.5                             | 26.3                             | 51.0                             | 52.2                             |
| 55.0                          | 41.6                          | 24.5                             | 27.3                             | 52.1                             | 53.2                             |
| 56.0                          | 42.7                          | 25.5                             | 28.3                             | 53.1                             | 54.2                             |
| 57.0                          | 43.8                          | 26.5                             | 29.4                             | 54.2                             | 55.2                             |
| 58.0                          | 44.9                          | 27.5                             | 30.4                             | 55.3                             | 56.3                             |
| 59.0                          | 46.1                          | 28.5                             | 31.4                             | 56.3                             | 57.3                             |
| 60.0                          | 47.2                          | 29.6                             | 32.5                             | 57.4                             | 58.3                             |
| 61.0                          | 48.3                          | 30.6                             | 33.5                             | 58.5                             | 59.3                             |
| 62.0                          | 49.4                          | 31.6                             | 34.5                             | 59.6                             | 60.4                             |
| 63.0                          | 50.5                          | 32.6                             | 35.6                             | 60.6                             | 61.4                             |
| 64.0                          | 51.6                          | 33.7                             | 36.6                             | 61.7                             | 62.4                             |
| 65.0                          | 52.7                          | 34.7                             | 37.7                             | 62.8                             | 63.5                             |
| 66.0                          | 53.8                          | 35.8                             | 38.7                             | 63.8                             | 64.5                             |
| 67.0                          | 54.9                          | 36.8                             | 39.8                             | 64.9                             | 65.6                             |
| 68.0                          | 56.0                          | 37.8                             | 40.8                             | 66.0                             | 66.6                             |
| 69.0                          | 57.1                          | 38.9                             | 41.9                             | 67.0                             | 67.6                             |
| 70.0                          | 58.2                          | 39.9                             | 42.9                             | 68.1                             | 68.7                             |
| 71.0                          | 59.3                          | 41.0                             | 44.0                             | 69.2                             | 69.7                             |
| 72.0                          | 60.3                          | 42.0                             | 45.0                             | 70.2                             | 70.8                             |
| 73.0                          | 61.4                          | 43.1                             | 46.1                             | 71.3                             | 71.8                             |
| 74.0                          | 62.5                          | 44.1                             | 47.1                             | 72.4                             | 72.9                             |
| 75.0                          | 63.6                          | 45.2                             | 48.2                             | 73.5                             | 74.0                             |
| 76.0                          | 64.7                          | 46.2                             | 49.3                             | 74.5                             | 75.0                             |
| 77.0                          | 65.7                          | 47.3                             | 50.3                             | 75.6                             | 76.1                             |
| 78.0                          | 66.8                          | 48.4                             | 51.4                             | 76.6                             | 77.1                             |
| 79.0                          | 67.9                          | 49.4                             | 52.4                             | 77.7                             | 78.2                             |
| 80.0                          | 68.9                          | 50.5                             | 53.5                             | 78.8                             | 79.3                             |
| 81.0                          | 70.0                          | 51.5                             | 54.6                             | 79.8                             | 80.3                             |
| 82.0                          | 71.1                          | 52.6                             | 55.6                             | 80.9                             | 81.4                             |
| 83.0                          | 72.1                          | 53.7                             | 56.7                             | 82.0                             | 82.5                             |
| 84.0                          | 73.2                          | 54.7                             | 57.8                             | 83.0                             | 83.5                             |
| 85.0                          | 74.2                          | 55.8                             | 58.8                             | 84.1                             | 84.6                             |
| 86.0                          | 75.3                          | 56.9                             | 59.9                             | 85.2                             | 85.7                             |
| 87.0                          | 76.4                          | 57.9                             | 61.0                             | 86.2                             | 86.7                             |
| 88.0                          | 77.4                          | 59.0                             | 62.0                             | 87.3                             | 87.8                             |
| 89.0                          | 78.5                          | 60.1                             | 63.1                             | 88.4                             | 88.9                             |
| 90.0                          | 79.5                          | 61.1                             | 64.1                             | 89.4                             | 89.9                             |
| 91.0                          | 80.6                          | 62.2                             | 65.2                             | 90.5                             | 91.0                             |
| 92.0                          | 81.6                          | 63.3                             | 66.3                             | 91.5                             | 92.1                             |
| 93.0                          | 82.7                          | 64.4                             | 67.4                             | 92.6                             | 93.2                             |
| 94.0                          | 83.7                          | 65.5                             | 68.4                             | 93.7                             | 94.3                             |
| 95.0                          | 84.7                          | 66.5                             | 69.5                             | 94.7                             | 95.3                             |
| 96.0                          | 85.8                          | 67.6                             | 70.6                             | 95.8                             | 96.4                             |
| 97.0                          | 86.8                          | 68.7                             | 71.7                             | 96.8                             | 97.5                             |
| 98.0                          | 87.9                          | 69.8                             | 72.7                             | 97.9                             | 98.5                             |
| 99.0                          | 88.9                          | 70.8                             | 73.8                             | 98.9                             | 99.6                             |
| 100.0                         | 89.9                          | 71.9                             | 74.8                             | 100.0                            | 100.7                            |
